# Supplementary material
Source: MDPI journal article supplement (https://www.mdpi.com/2571-6980/3/1/2)
Supplement: s1 [file s1]

Archive with 1 entries (1 files):
- neuroglia-1518737-supplementary.pdf
